# Supplementary material for: Intranasal Delivery of Copper Oxide Nanoparticles Induces Pulmonary Toxicity and Fibrosis in C57BL/6 mice
Source: PubMed Central journal article supplement (PMC5852054; doi:10.1038/s41598-018-22556-7), 2018-03-14
Supplement: 41598_2018_22556_MOESM1_ESM.pdf [file 41598_2018_22556_MOESM1_ESM.pdf]

**Title page:**

**Intranasal Delivery of Copper Oxide Nanoparticles Induces Pulmonary Toxicity and Fibrosis in C57BL/6 mice**

Xiaofeng Lai<sup>1†</sup>, Hu Zhao<sup>2†</sup>, Yong Zhang<sup>3†</sup>, Kai Guo<sup>4</sup>, Yuqiao Xu<sup>5</sup>, Suning Chen<sup>6\*</sup>, Jian Zhang<sup>1\*</sup>

\*Correspondence to: Jian Zhang, State Key Laboratory of Cancer Biology,

†These authors contributed equally to this work.

<sup>1</sup>State Key Laboratory of Cancer Biology, Department of Biochemistry and Molecular Biology, the Fourth Military Medical University, Xi'an 710032, P.R. China.

<sup>2</sup>Fujian Provincial Key Laboratory of Transplant Biology, Fuzhou General Hospital, Xiamen University, Fuzhou, Fujian 350025, P.R. China.

<sup>3</sup>Department of Respiratory Medicine, Xijing Hospital, the Fourth Military Medical University, Xi'an 710032, P.R. China.

<sup>4</sup>Department of Orthopedics, Xijing Hospital, the Fourth Military Medical University, Xi'an, Shaanxi, 710032, P.R. China.

<sup>5</sup>State Key Laboratory of Cancer Biology, Department of Pathology, the Fourth Military Medical University, Xi'an 710032, P.R. China.

<sup>6</sup>Department of Pharmacy, Xijing Hospital, the Fourth Military Medical University, Xi'an, Shaanxi, 710032, P.R. China.

Correspondence: **Jian Zhang** and **Sunning Chen**, the Fourth Military Medical University, Changle Western Road 169, Xi'an 710032, P.R. China. E-mail: biozhangj@fmmu.edu.cn and Chensning@163.com.

This work was supported by National High-tech R&D Program of China (2014AA020517) and National Natural Science Foundation of China (81230043, 31571437).

**Figure S1 Percent body weight change after different CuO NPs treatment over time.** Saline group mice gained weight while three other group loss

weight over the duration of CuO NPs treatment until d10. Significant differences in body weight between saline and CuO NPs treated mice are indicated by \* ( $p < 0.05$ ).

**Figure S2 HE staining of lung tissues after 5 mg/kg CuO NPs treatment for different time.**

**Figure S3 Cell viability assessment of CuO NPs treatment (24h) in BEAS-2B and A549 cells by ATP assay (a-b) and colony forming ability assay(c-d).** Student's t-test.  $n=3$ , \* $p < 0.05$ ; \*\* $p < 0.01$ ; \*\*\* $p < 0.001$ ; \*\*\*\* $p < 0.0001$ .

**Figure S4 Comparative cytotoxicity analysis of  $\text{Cu}^{2+}$  ions and CuO NPs treatment in BEAS-2B and A549 cells for 24 h.**

**Figure S5 TGF beta activated SMA in human fetal lung fibroblasts MRC-5 cells.**

**Table S1 Characteristics of CuO NPs used in this study (10  $\mu\text{g/ml}$ ).**

**Table S2 Particle size characterized by Desla Nano.**

# Figure S1

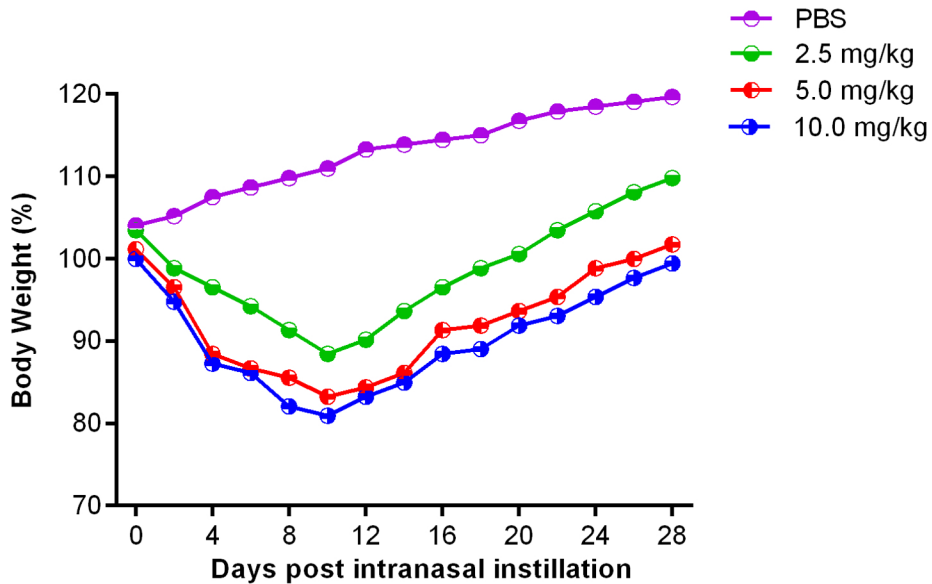

**Figure S2**

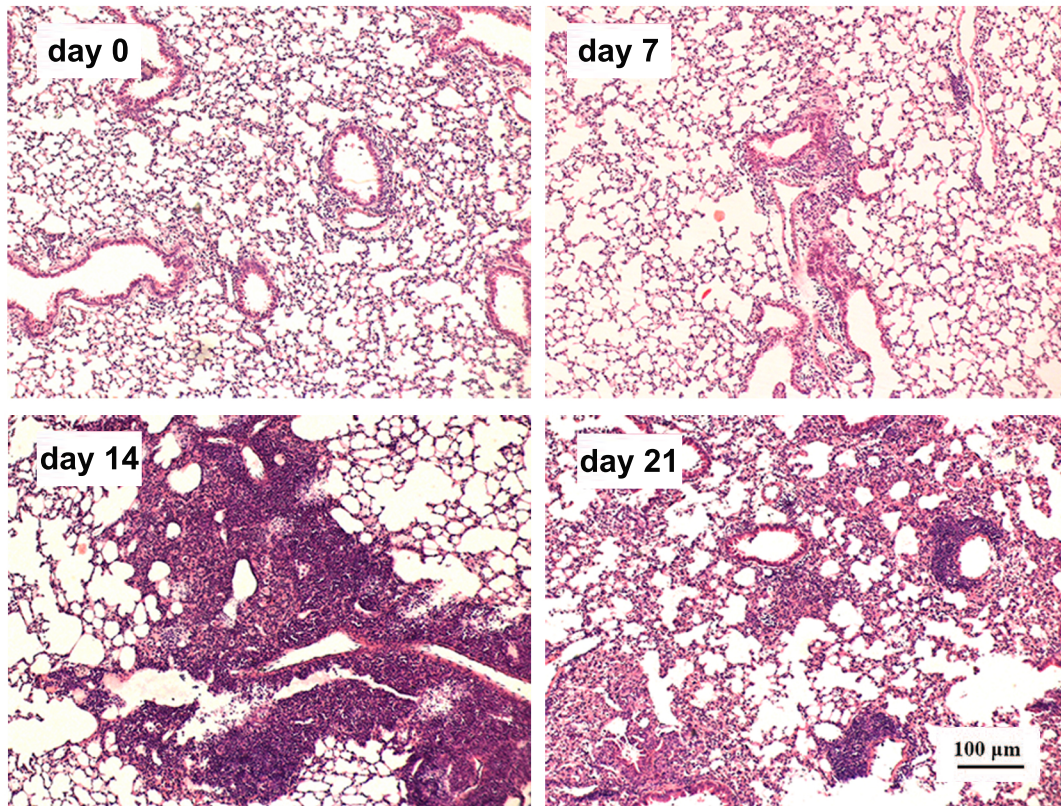



# Figure S3

**a**

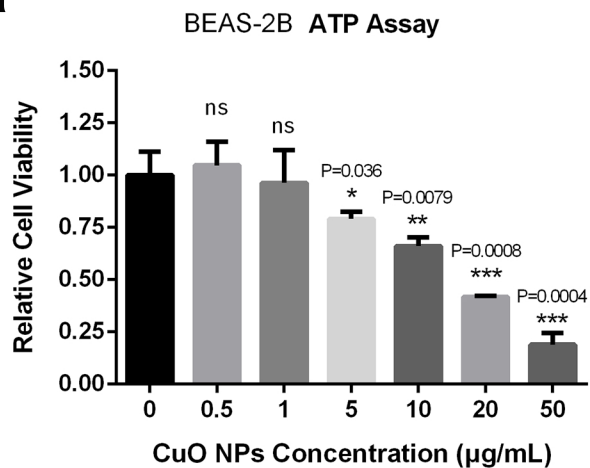

**b**

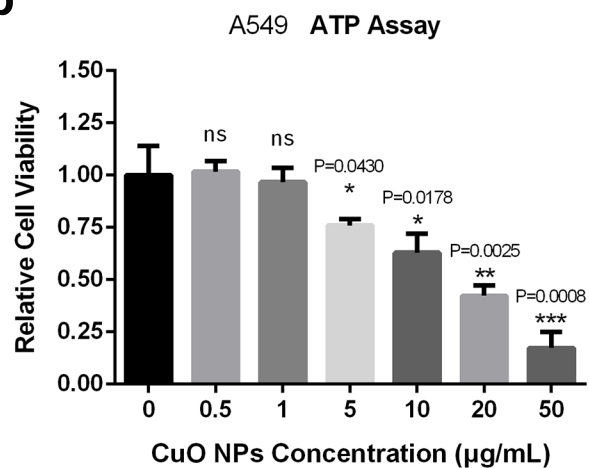

**c**

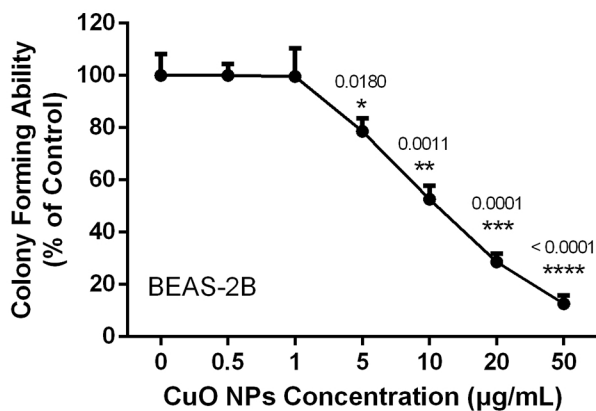

**d**

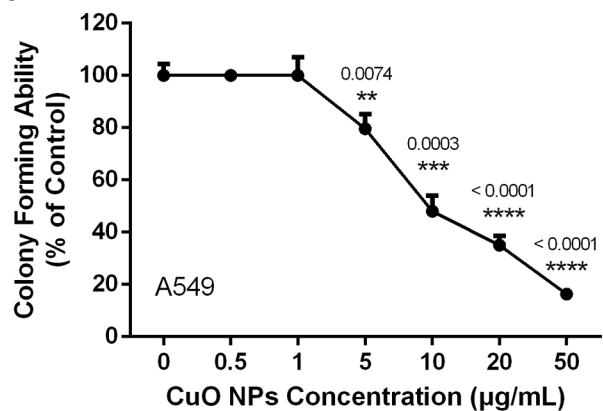

# Figure S4

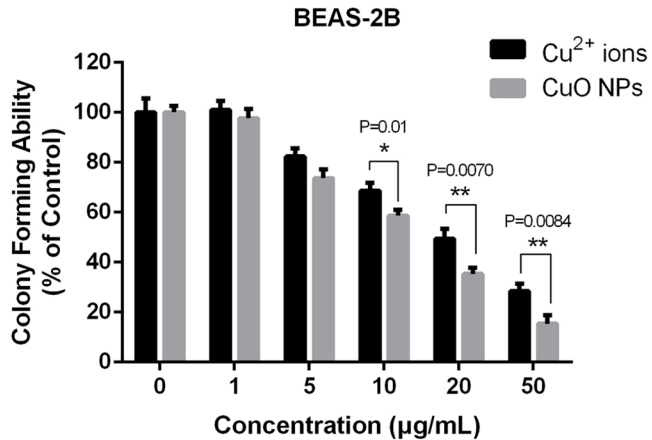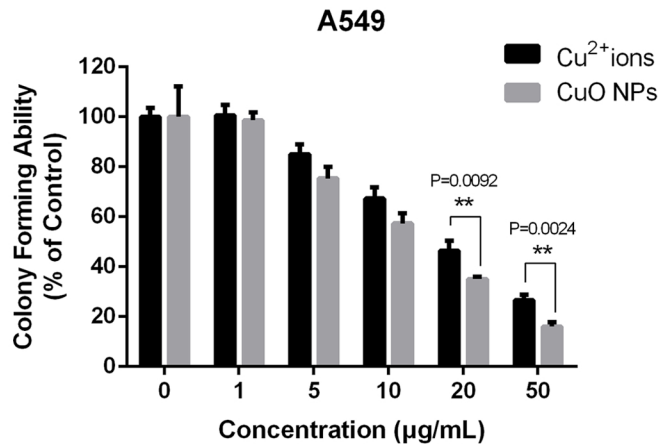

**Figure S5**

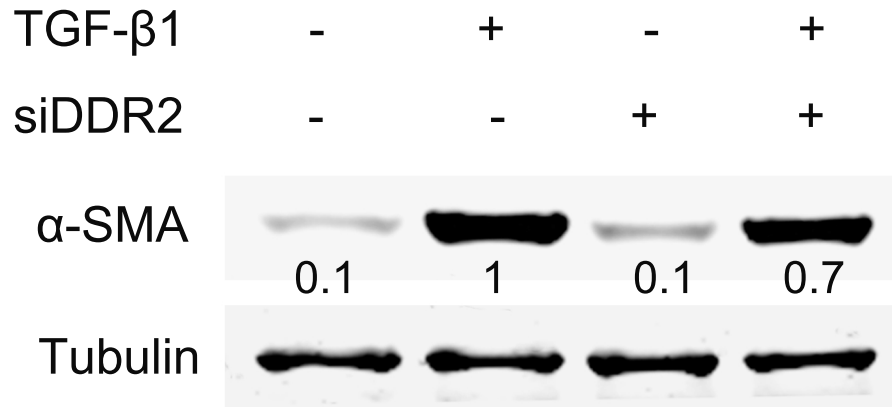

# Table S1

Characteristics of CuO NPs used in the study (10  $\mu\text{g/ml}$ )

| Data from manufacture          |                                | TEM analysis     |                  |
|--------------------------------|--------------------------------|------------------|------------------|
| Average diameter<br>in TEM(nm) | Specific surface<br>area(m /g) | Average size(nm) | Morphology       |
| <50                            | 29                             | 46.5             | Nearly spherical |

# Table S2

Intensity Distribution

S/N : 142412

|          |             |                    |                    |            |               |
|----------|-------------|--------------------|--------------------|------------|---------------|
| User     | : Common    | Group              | : CuO              | Repetition | : 1/1         |
| Date     | : 11/8/2017 | File Name          | : QYB              |            |               |
| Time     | : 10:07:06  | Sample Information | : 20171108 lxf H2O |            |               |
| SOP Name | : YHL       |                    |                    | Security   | : No Security |

Version 3.73 / 2.30

Intensity Distribution

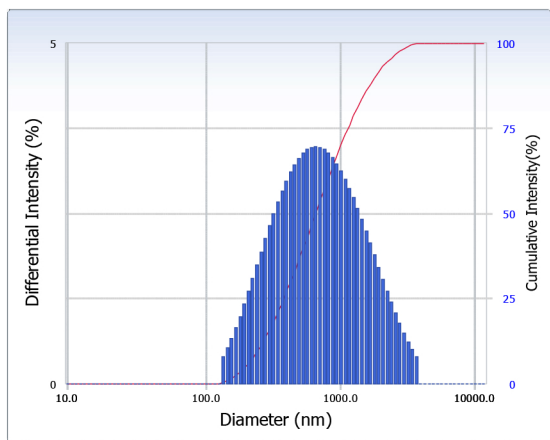

ACF

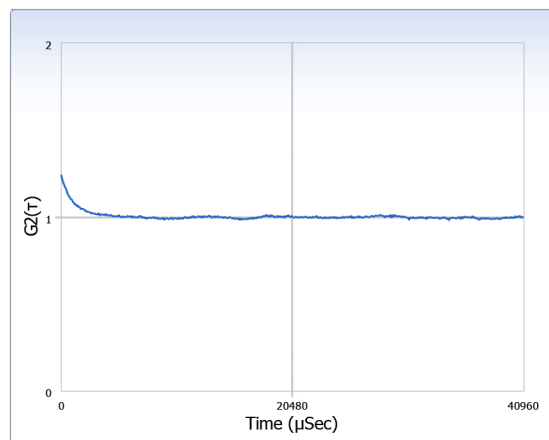

## Distribution Results (Contin)

| Peak     | Diameter (nm) | Std. Dev. |
|----------|---------------|-----------|
| 1        | 914.6         | 696.8     |
| 2        | 0.0           | 0.0       |
| 3        | 0.0           | 0.0       |
| 4        | 0.0           | 0.0       |
| 5        | 0.0           | 0.0       |
| Average  | 914.6         | 696.8     |
| Residual | : 3.199e-003  | (O.K)     |

## Cumulants Results

|                             |              |                        |
|-----------------------------|--------------|------------------------|
| Diameter (d)                | : 590.9      | (nm)                   |
| Polydispersity Index (P.I.) | : 0.302      |                        |
| Diffusion Const. (D)        | : 8.325e-009 | (cm <sup>2</sup> /sec) |
| Molecular Weight            | : 1.201e+007 |                        |
| Measurement Condition       |              |                        |
| Temperature                 | : 25.0       | (°C)                   |
| Diluent Name                | : WATER      |                        |
| Refractive Index            | : 1.3328     |                        |
| Viscosity                   | : 0.8878     | (cP)                   |
| Scattering Intensity        | : 23864      | (cps)                  |
| Attenuator 1                | : 12.61      | (%)                    |

# Original Datasets

## Figure 4C supplementary data

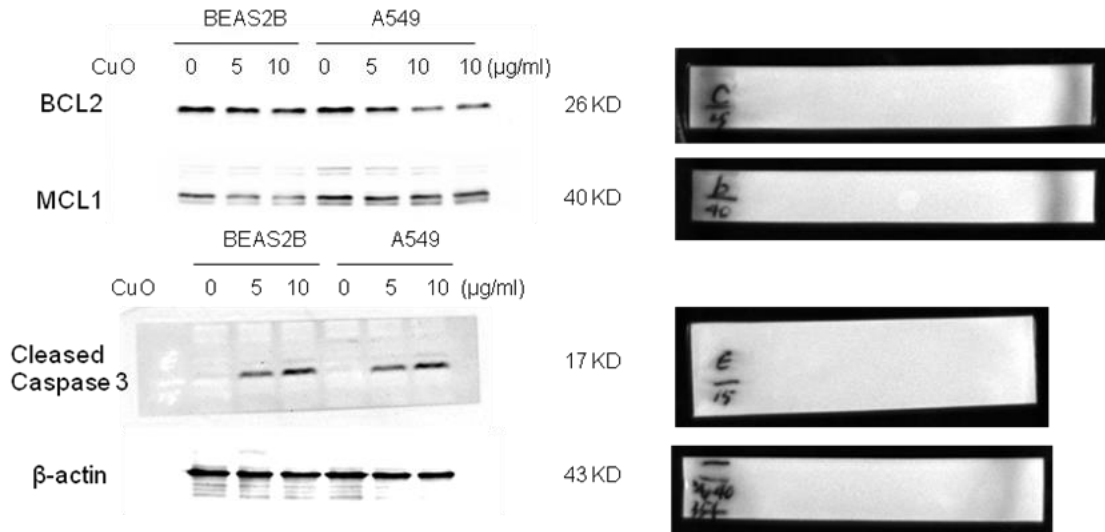

## Figure 5C supplementary data

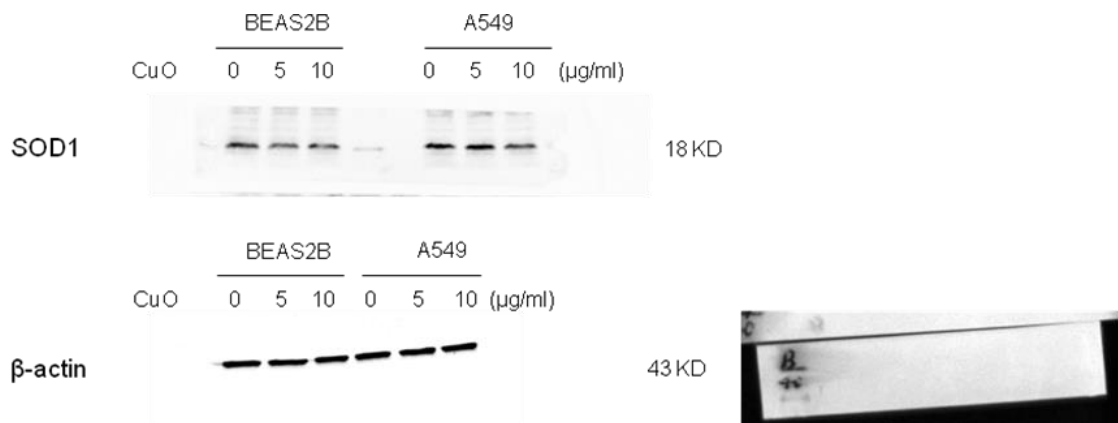

We forgot to capture the bright field of SOD1 membrane.

**Figure 6C supplementary data**

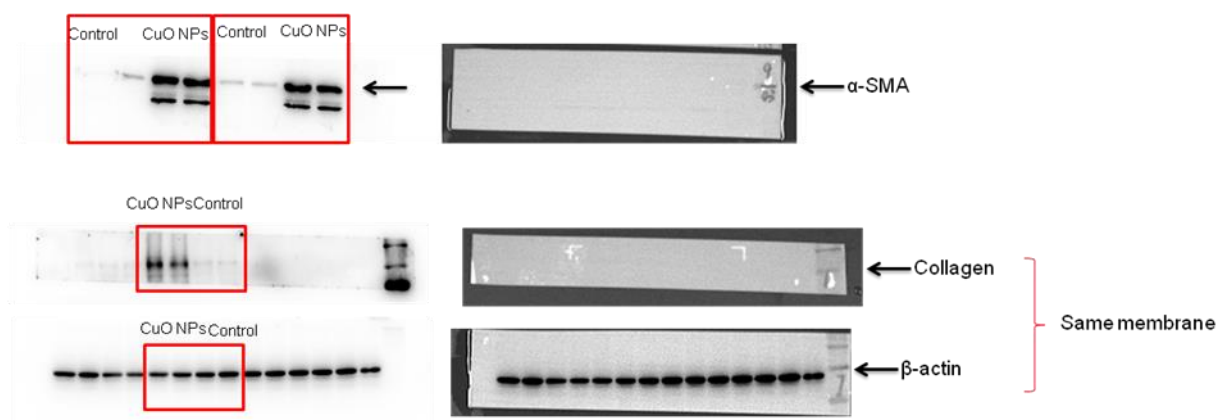

(Upper) samples were loaded twice on membrane.

(Lower) Other samples were loaded on this membrane, lanes 7-10 were our target.
